# Supplementary material for: Role of Melatonin in Apple Fruit during Growth and Ripening: Possible Interaction with Ethylene
Source: MDPI journal article supplement (doi:10.3390/plants11050688), 2022-03-02
Supplement: s1 [file s1]

**Table S1.** Evolution of the growth parameters (longitudinal and equatorial perimeters, weight and color variation) in five apple varieties during the post-anthesis period. Data are expressed as mean  $\pm$  SEM ( $n = 5$ ). Different letters indicate significant differences between sampling days post-anthesis within each variety,  $p < 0.001$ .

|                             | Days Post-Anthesis       |                           |                           |                           |                           |                           |                            |                             |                             |                            |
|-----------------------------|--------------------------|---------------------------|---------------------------|---------------------------|---------------------------|---------------------------|----------------------------|-----------------------------|-----------------------------|----------------------------|
|                             | 0                        | 7                         | 11                        | 18                        | 32                        | 60                        | 98                         | 130                         | 152                         | 164                        |
| Longitudinal Perimeter (cm) |                          |                           |                           |                           |                           |                           |                            |                             |                             |                            |
| Golden                      | 2,59 ± 0,13 <sup>a</sup> | 3,57 ± 0,07 <sup>b</sup>  | 6,30 ± 0,15 <sup>c</sup>  | 8,76 ± 0,19 <sup>d</sup>  | 11,23 ± 0,28 <sup>e</sup> | 14,89 ± 0,28 <sup>f</sup> | 17,36 ± 0,30 <sup>g</sup>  | 18,27 ± 0,25 <sup>h</sup>   | 19,38 ± 0,22 <sup>i</sup>   | 19,76 ± 0,17 <sup>i</sup>  |
| Reineta                     | 3,23 ± 0,15 <sup>a</sup> | 4,65 ± 0,14 <sup>b</sup>  | 8,44 ± 0,17 <sup>c</sup>  | 12,36 ± 0,56 <sup>d</sup> | 14,00 ± 0,14 <sup>e</sup> | 14,90 ± 0,44 <sup>e</sup> | 15,43 ± 0,20 <sup>f</sup>  | 18,23 ± 0,41 <sup>g</sup>   | 19,51 ± 0,13 <sup>h</sup>   | 19,85 ± 0,69 <sup>h</sup>  |
| Teórica                     | 3,63 ± 0,13 <sup>a</sup> | 4,42 ± 0,33 <sup>b</sup>  | 6,30 ± 0,19 <sup>c</sup>  | 7,36 ± 0,29 <sup>d</sup>  | 8,04 ± 0,22 <sup>e</sup>  | 10,47 ± 0,20 <sup>f</sup> | 13,25 ± 0,17 <sup>g</sup>  | 15,58 ± 0,11 <sup>h</sup>   | 16,62 ± 0,17 <sup>i</sup>   | 17,93 ± 0,24 <sup>j</sup>  |
| Sanroqueña                  | 2,77 ± 0,03 <sup>a</sup> | 3,93 ± 0,09 <sup>b</sup>  | 4,97 ± 0,09 <sup>c</sup>  | 8,97 ± 0,22 <sup>d</sup>  | 12,00 ± 0,37 <sup>e</sup> | 17,55 ± 0,39 <sup>f</sup> | 18,03 ± 0,20 <sup>f</sup>  | 19,15 ± 0,26 <sup>g</sup>   | 19,88 ± 0,50 <sup>g</sup>   | 20,45 ± 0,17 <sup>g</sup>  |
| Caguleira                   | 3,05 ± 0,03 <sup>a</sup> | 4,18 ± 0,19 <sup>b</sup>  | 6,90 ± 0,12 <sup>c</sup>  | 9,03 ± 0,54 <sup>d</sup>  | 10,83 ± 0,45 <sup>e</sup> | 13,23 ± 0,33 <sup>f</sup> | 15,03 ± 0,21 <sup>g</sup>  | 17,26 ± 0,23 <sup>h</sup>   | 18,28 ± 0,34 <sup>i</sup>   | 18,85 ± 0,30 <sup>i</sup>  |
| Equatorial Perimeter (cm)   |                          |                           |                           |                           |                           |                           |                            |                             |                             |                            |
| Golden                      | 3,00 ± 0,12 <sup>a</sup> | 5,06 ± 0,11 <sup>b</sup>  | 7,20 ± 0,21 <sup>c</sup>  | 10,77 ± 0,17 <sup>d</sup> | 11,33 ± 0,17 <sup>e</sup> | 14,76 ± 0,16 <sup>f</sup> | 18,31 ± 0,28 <sup>g</sup>  | 18,60 ± 0,24 <sup>g</sup>   | 18,97 ± 0,27 <sup>g</sup>   | 19,99 ± 0,22 <sup>h</sup>  |
| Reineta                     | 2,40 ± 0,00 <sup>a</sup> | 4,08 ± 0,12 <sup>b</sup>  | 5,94 ± 0,36 <sup>c</sup>  | 9,26 ± 0,26 <sup>d</sup>  | 10,75 ± 0,14 <sup>e</sup> | 14,55 ± 0,12 <sup>f</sup> | 16,48 ± 0,09 <sup>g</sup>  | 17,33 ± 0,25 <sup>h</sup>   | 19,23 ± 0,18 <sup>i</sup>   | 20,78 ± 0,19 <sup>j</sup>  |
| Teórica                     | 3,15 ± 0,17 <sup>a</sup> | 5,74 ± 0,22 <sup>b</sup>  | 7,05 ± 0,31 <sup>c</sup>  | 8,00 ± 0,24 <sup>d</sup>  | 8,98 ± 0,14 <sup>e</sup>  | 11,15 ± 0,11 <sup>f</sup> | 13,30 ± 0,16 <sup>g</sup>  | 15,75 ± 0,18 <sup>h</sup>   | 16,78 ± 0,13 <sup>i</sup>   | 17,96 ± 0,20 <sup>j</sup>  |
| Sanroqueña                  | 4,13 ± 0,15 <sup>a</sup> | 5,17 ± 0,18 <sup>b</sup>  | 6,03 ± 0,15 <sup>c</sup>  | 10,23 ± 0,35 <sup>d</sup> | 13,13 ± 0,11 <sup>e</sup> | 16,53 ± 0,17 <sup>f</sup> | 19,33 ± 0,34 <sup>g</sup>  | 20,45 ± 0,19 <sup>h</sup>   | 21,98 ± 0,18 <sup>i</sup>   | 22,23 ± 0,15 <sup>i</sup>  |
| Caguleira                   | 3,75 ± 0,10 <sup>a</sup> | 4,83 ± 0,09 <sup>b</sup>  | 6,73 ± 0,20 <sup>c</sup>  | 9,03 ± 0,38 <sup>d</sup>  | 10,38 ± 0,36 <sup>e</sup> | 12,25 ± 0,17 <sup>f</sup> | 14,40 ± 0,16 <sup>g</sup>  | 16,95 ± 0,21 <sup>h</sup>   | 18,33 ± 0,18 <sup>i</sup>   | 18,73 ± 0,34 <sup>i</sup>  |
| Weight (g)                  |                          |                           |                           |                           |                           |                           |                            |                             |                             |                            |
| Golden                      | 0,34 ± 0,02 <sup>a</sup> | 0,78 ± 0,05 <sup>b</sup>  | 8,61 ± 0,65 <sup>c</sup>  | 10,72 ± 0,38 <sup>c</sup> | 20,67 ± 0,98 <sup>d</sup> | 43,97 ± 1,50 <sup>e</sup> | 82,25 ± 3,24 <sup>f</sup>  | 85,71 ± 2,64 <sup>f</sup>   | 95,90 ± 3,54 <sup>fg</sup>  | 99,72 ± 3,96 <sup>g</sup>  |
| Reineta                     | 0,25 ± 0,03 <sup>a</sup> | 0,92 ± 0,06 <sup>b</sup>  | 8,43 ± 0,40 <sup>c</sup>  | 17,47 ± 0,62 <sup>d</sup> | 42,28 ± 1,41 <sup>e</sup> | 54,54 ± 2,65 <sup>f</sup> | 73,60 ± 2,10 <sup>g</sup>  | 81,90 ± 2,36 <sup>g</sup>   | 96,39 ± 1,76 <sup>h</sup>   | 101,97 ± 3,01 <sup>h</sup> |
| Teórica                     | 0,38 ± 0,02 <sup>a</sup> | 0,80 ± 0,03 <sup>b</sup>  | 1,58 ± 0,15 <sup>c</sup>  | 5,35 ± 0,28 <sup>de</sup> | 9,69 ± 0,45 <sup>e</sup>  | 18,78 ± 0,57 <sup>f</sup> | 51,17 ± 1,32 <sup>g</sup>  | 61,98 ± 2,15 <sup>h</sup>   | 68,93 ± 0,98 <sup>hi</sup>  | 73,08 ± 1,24 <sup>i</sup>  |
| Sanroqueña                  | 0,62 ± 0,03 <sup>a</sup> | 1,50 ± 0,04 <sup>b</sup>  | 2,78 ± 0,23 <sup>b</sup>  | 12,68 ± 1,07 <sup>c</sup> | 31,07 ± 1,66 <sup>d</sup> | 75,11 ± 1,81 <sup>e</sup> | 102,30 ± 1,55 <sup>f</sup> | 109,30 ± 1,66 <sup>fg</sup> | 112,35 ± 0,68 <sup>fg</sup> | 117,69 ± 3,91 <sup>g</sup> |
| Caguleira                   | 0,67 ± 0,02 <sup>a</sup> | 1,27 ± 0,10 <sup>b</sup>  | 6,74 ± 0,42 <sup>c</sup>  | 12,24 ± 0,51 <sup>d</sup> | 16,27 ± 1,47 <sup>e</sup> | 32,70 ± 1,87 <sup>f</sup> | 65,51 ± 1,96 <sup>g</sup>  | 72,40 ± 2,75 <sup>g</sup>   | 89,98 ± 0,62 <sup>h</sup>   | 93,63 ± 2,69 <sup>h</sup>  |
| Color Variation (ΔEab*)     |                          |                           |                           |                           |                           |                           |                            |                             |                             |                            |
| Golden                      | -                        | 9,49 ± 0,59 <sup>b</sup>  | 11,32 ± 0,63 <sup>c</sup> | 12,41 ± 1,00 <sup>c</sup> | 24,33 ± 0,78 <sup>d</sup> | 32,57 ± 0,90 <sup>e</sup> | 39,28 ± 0,92 <sup>f</sup>  | 41,02 ± 0,17 <sup>f</sup>   | 43,14 ± 0,75 <sup>f</sup>   | 49,80 ± 0,46 <sup>g</sup>  |
| Reineta                     | -                        | 21,40 ± 0,57 <sup>b</sup> | 22,84 ± 0,57 <sup>c</sup> | 26,83 ± 0,25 <sup>d</sup> | 27,51 ± 0,39 <sup>d</sup> | 33,70 ± 0,39 <sup>e</sup> | 36,37 ± 0,60 <sup>f</sup>  | 37,32 ± 0,52 <sup>f</sup>   | 38,28 ± 0,93 <sup>f</sup>   | 43,82 ± 0,76 <sup>g</sup>  |
| Teórica                     | -                        | 10,90 ± 0,43 <sup>b</sup> | 12,25 ± 0,58 <sup>c</sup> | 16,42 ± 0,91 <sup>d</sup> | 22,30 ± 1,09 <sup>e</sup> | 29,37 ± 0,83 <sup>f</sup> | 31,28 ± 0,84 <sup>f</sup>  | 39,17 ± 0,58 <sup>g</sup>   | 47,36 ± 0,95 <sup>h</sup>   | 47,91 ± 0,66 <sup>h</sup>  |
| Sanroqueña                  | -                        | 12,88 ± 0,76 <sup>b</sup> | 13,98 ± 0,15 <sup>b</sup> | 15,52 ± 0,51 <sup>c</sup> | 16,33 ± 0,54 <sup>c</sup> | 22,55 ± 0,47 <sup>d</sup> | 24,66 ± 0,46 <sup>e</sup>  | 25,22 ± 0,49 <sup>e</sup>   | 39,97 ± 0,64 <sup>f</sup>   | 45,11 ± 1,20 <sup>g</sup>  |
| Caguleira                   | -                        | 10,29 ± 0,55 <sup>b</sup> | 12,25 ± 0,58 <sup>c</sup> | 17,09 ± 0,61 <sup>d</sup> | 20,45 ± 0,56 <sup>e</sup> | 23,74 ± 0,32 <sup>f</sup> | 34,01 ± 0,41 <sup>g</sup>  | 43,47 ± 0,51 <sup>h</sup>   | 44,99 ± 0,58 <sup>h</sup>   | 45,15 ± 0,66 <sup>h</sup>  |
